# Supplementary material
Source: MDPI journal article supplement (https://www.mdpi.com/2073-4395/10/4/499)
Supplement: s1 [file s1]

## Supplementary Material

**Figure S1.** Wheat plants growth conditions

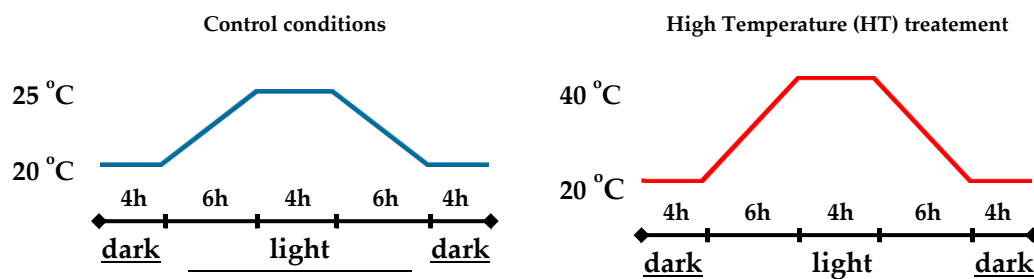

Notes: One week High Temperature (HT) treatment, mimetizing a heat wave, was performed ten days after anthesis in growth chambers with controlled conditions at 8h dark / 16h light cycle. During the 16 h light, a progressive temperature increase from 20°C to 40°C was implemented (20°C to 25°C in control), temperature was maintained 4h at 40°C and then progressive decreased back to 20°C.

**Table S1.** Single grain nitrogen content quantification by elemental analysis in mature grains

| Bread wheat varieties | Control |      |      | HT Treatment |      |      |
|-----------------------|---------|------|------|--------------|------|------|
|                       | 1       | 2    | 3    | 1            | 2    | 3    |
| Biological replicates |         |      |      |              |      |      |
| <b>Almansor</b>       | 1.97    | 1.92 | 1.7  | 1.96         | 1.81 | 1.94 |
| <b>Antequera</b>      | 2.28    | 2.43 | 2.37 | 2.52         | 2.12 | 1.8  |
| <b>Bancal</b>         | 1.95    | 2.04 | 2.28 | 1.83         | 1.88 | 1.83 |
| <b>Estero</b>         | 2.71    | 1.96 | 2.03 | 2.29         | 2.60 | 2.59 |
| <b>Nabão</b>          | 2.43    | 2.33 | 1.97 | 2.47         | 2.51 | 2.27 |
| <b>Pata Negra</b>     | 2.15    | 2.32 | 2.7  | 2.45         | 2.26 | 2.41 |
| <b>Roxo</b>           | 1.94    | 1.95 | 1.99 | 2.1          | 1.84 | 2.17 |

Notes: Values presented were obtained in the REQUIMTE@UCIBIO-FCT-UNL analytical laboratory using a Flash EA1112 CHNS analyzer (Thermo Finnigan CE Instruments, Italy) equipped with a gas chromatography column and a thermal conductivity detector. The three values presented per variety / temperature condition correspond to three biological replicates.
